# Supplementary material for: Atomic layer-deposited Ta2O5−x nano-islands for charge trapping memory devices
Source: Royal Society of Chemistry journal article supplement (doi:10.1039/d4tc03089c), 2024-01-01
Supplement: d4tc03089c1.pdf [file d4tc03089c1.pdf]

## Supplementary Materials

Song Sun<sup>a</sup>, Li Gao<sup>b</sup>, Ping Han<sup>a</sup>, Lin Zhu<sup>a</sup>, Wei-Min Li<sup>b</sup> and Ai-Dong Li<sup>a\*</sup>

<sup>a</sup> *National Laboratory of Solid State Microstructures, Department of Materials Science and Engineering, College of Engineering and Applied Sciences, Collaborative Innovation Center of Advanced Microstructures, Nanjing University, Nanjing 210093, China.*

<sup>b</sup> *Jiangsu Leadmicro Nano-Technology Co., Ltd., Wuxi 214000, China.*

\* *E-mail: [adli@nju.edu.cn](mailto:adli@nju.edu.cn)*

The estimation method on areal density, average width and height of Ta<sub>2</sub>O<sub>5-x</sub> nano-islands samples based on AFM results is described as follows:

- 1) Areal density: Draw a 200×200 nm<sup>2</sup> square in 2D AFM image and count the number of nano-islands inside the square using ImageJ software, and then convert the unit to cm<sup>2</sup> to obtain the areal density.
- 2) Average width: Measure the transverse size of all nano-islands in the above-mentioned 200×200 nm<sup>2</sup> square in 2D AFM image using ImageJ software, then calculate the average width of nano-islands and standard deviation. For 50-cycle sample, 1 μm×1 μm square is used.
- 3) Average height: Estimate the average height value based on the height curve of the line scan, for example, in Fig. 2(e) (red line indicated in Fig. 2(d)). Along the height curve, measure the relative height between every peak and the neighboring valley using ImageJ software and then calculate the average height value and standard deviation.

For 10-cycle Ta<sub>2</sub>O<sub>5-x</sub> nano-islands sample, the areal density and average width is estimated based on TEM result in Fig. S2. The average height still comes from the height curve of AFM in Fig. 2(b).

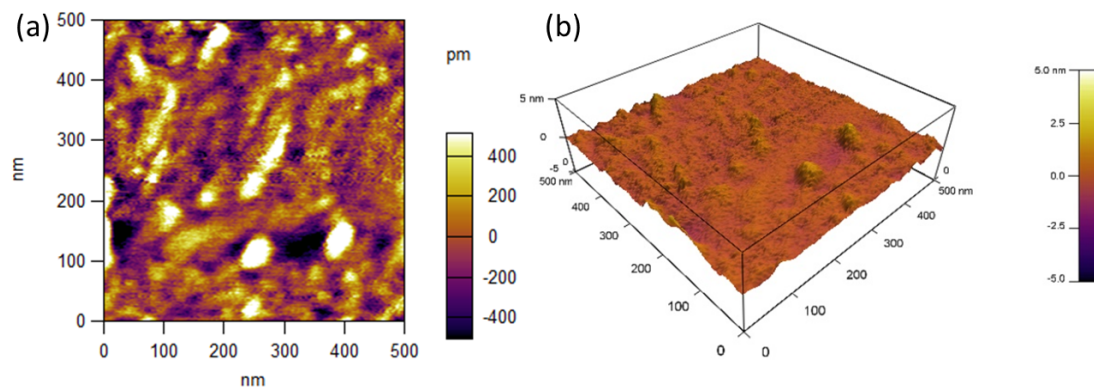

**Fig. S1** (a) 2D and (b) 3D AFM images of ALD-derived  $\text{Al}_2\text{O}_3$  thin films on Si.

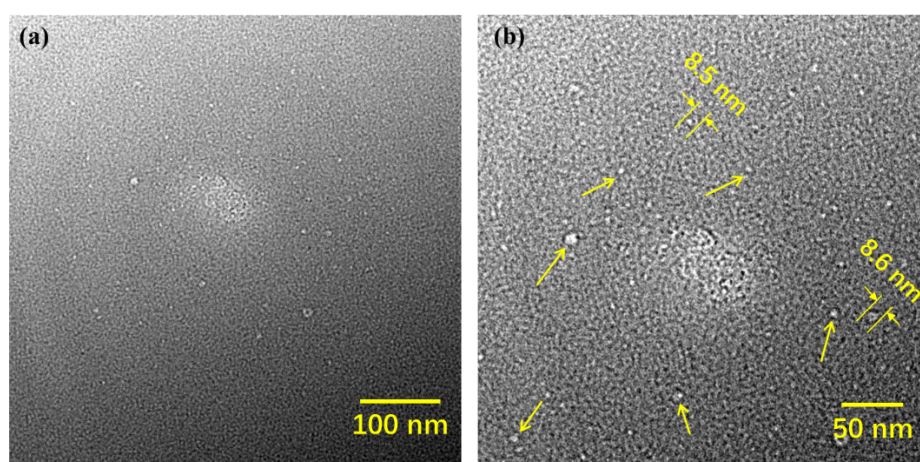

**Fig. S2** (a) The surface TEM image and (b) partial enlarged detail of 10-cycle  $\text{Ta}_2\text{O}_5$  nano-islands.

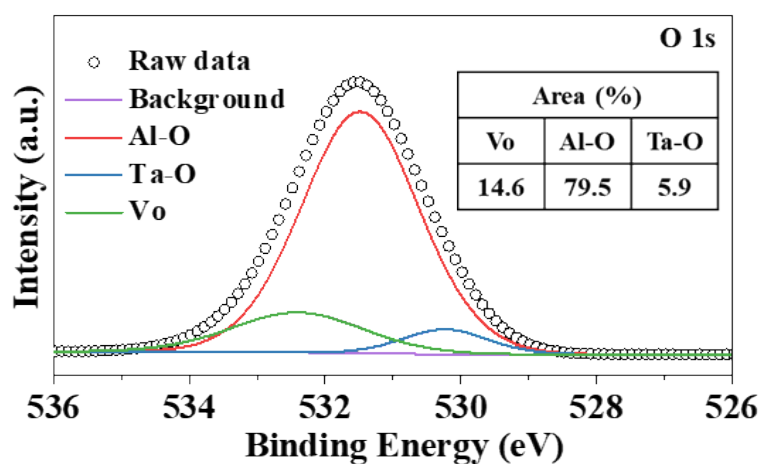

**Fig. S3** XPS spectrum of O 1s of 10-cycle  $\text{Ta}_2\text{O}_{5-x}$  nano-islands on  $\text{Al}_2\text{O}_3$  surface.

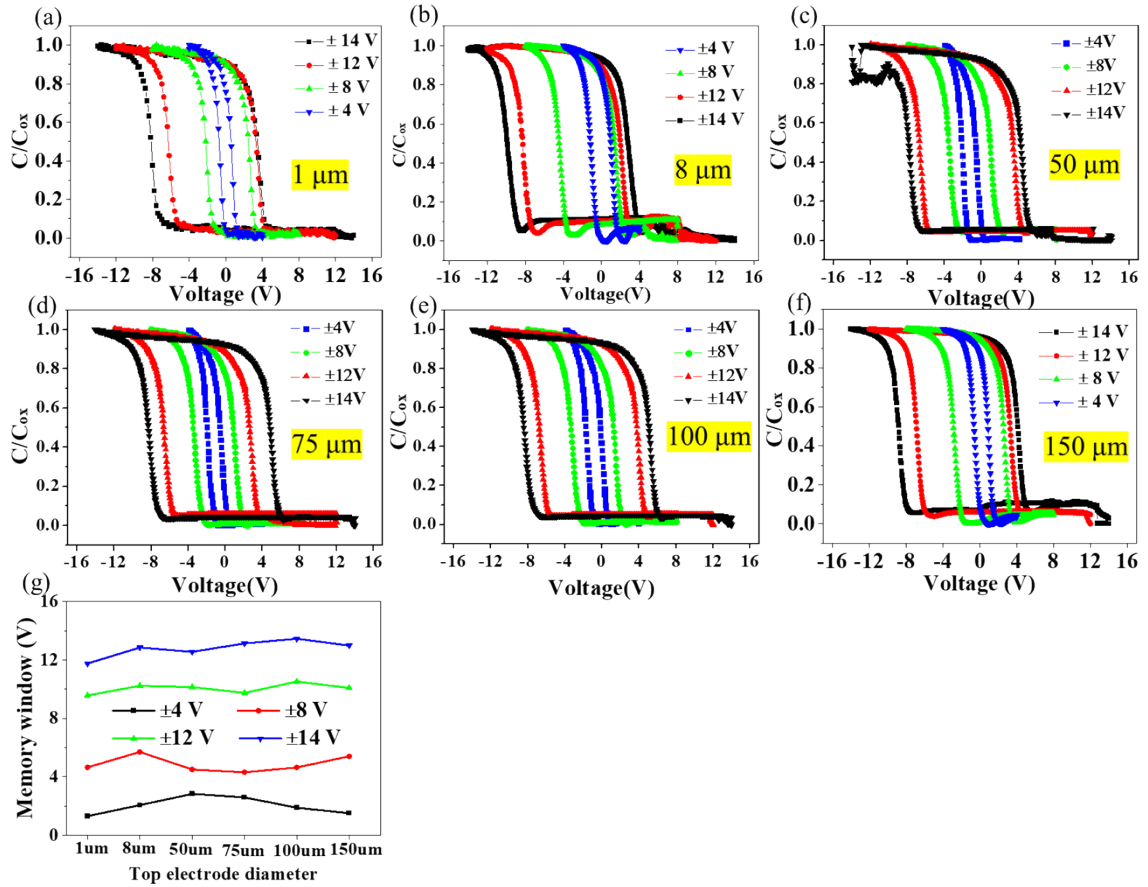

**Fig. S4** C-V curves of  $\text{Ta}_2\text{O}_{5-x}$  nano-islands CTM devices with different top electrode diameters: (a) 1  $\mu\text{m}$ , (b) 8  $\mu\text{m}$ , (c) 50  $\mu\text{m}$ , (d) 75  $\mu\text{m}$ , (e) 100  $\mu\text{m}$  and (f) 150  $\mu\text{m}$ . (g) Dependence curve of memory window on sweeping voltage at different top electrode diameters.

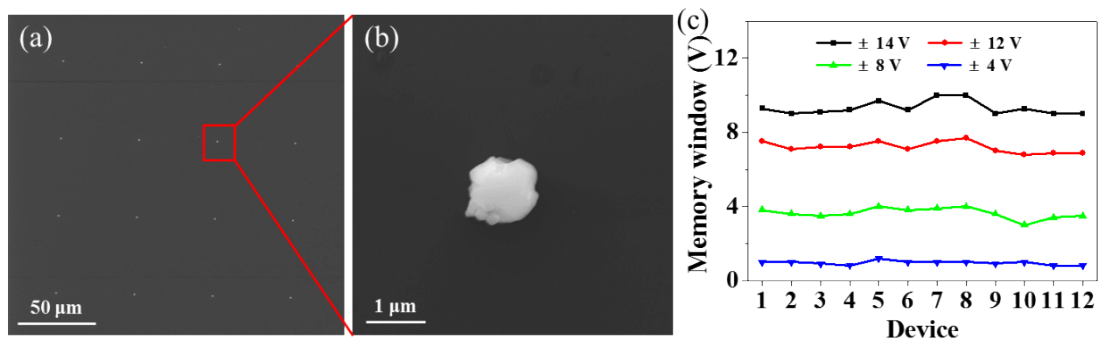

**Fig. S5** SEM images of (a) 16 CTM devices with 1  $\mu\text{m}$  top electrodes, (b) an enlarged view of a single CTM one with 1  $\mu\text{m}$  top electrode. (c) Device-to-device variability for memory window on sweeping voltage of 12 CTM devices with 1  $\mu\text{m}$  top electrode diameter.

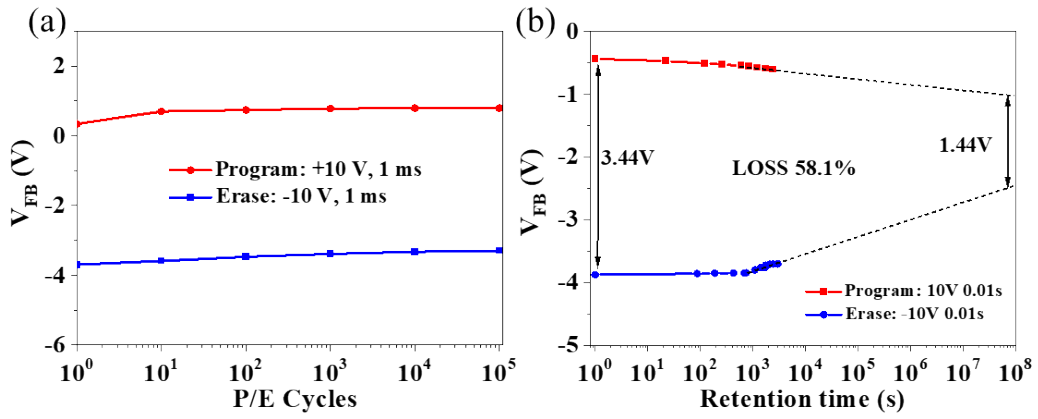

**Fig. S6** (a) Endurance and (b) retention of 20-cycle  $Ta_2O_{5-x}$  nano-islands CTM device at 0.01 ms and 0.01 s, respectively.

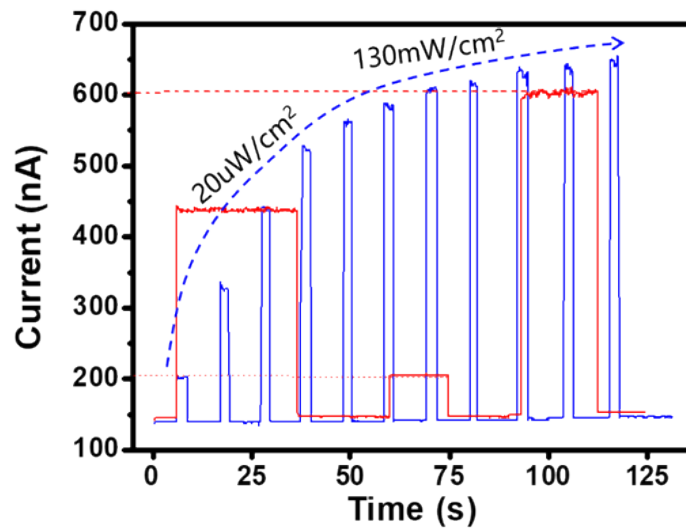

**Fig. S7** Photocurrent response of  $Ta_2O_{5-x}$  nano-islands CTM under 450 nm light at 0.1 V bias voltage.

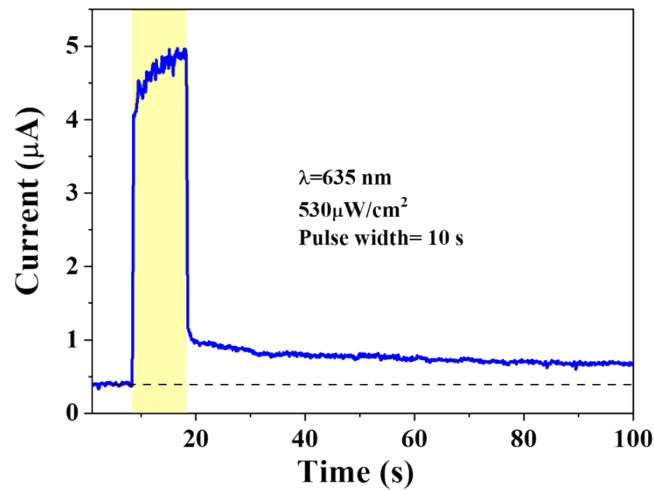

**Fig. S8** Photocurrent response of  $Ta_2O_{5-x}$  nano-islands CTM under 635 nm light at 2 V bias voltage.
